# Supplementary material
Source: PubMed Central journal article supplement (PMC8976825)
Supplement: NIHMS1775841-supplement-1.pdf [file NIHMS1775841-supplement-1.pdf]

# Supplemental Figure 1

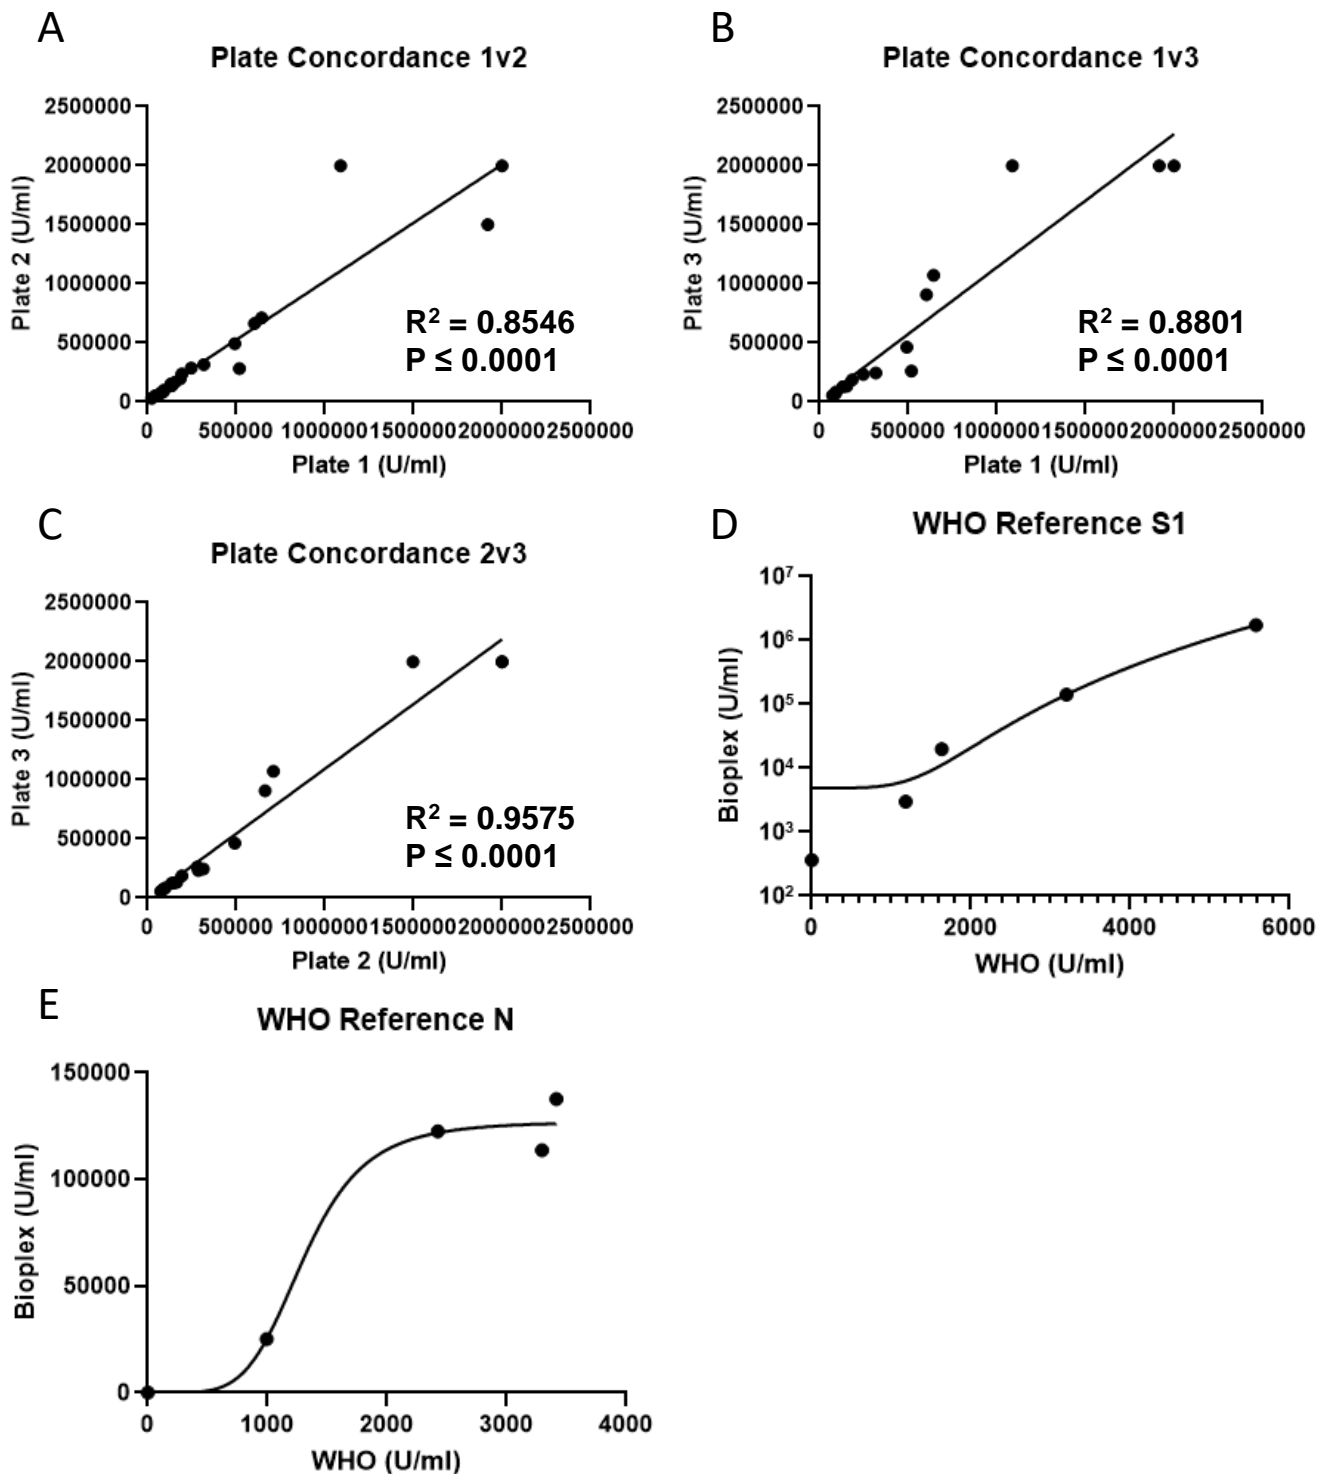

**Supplemental Figure 1** – Antibody multiplex validation. All study samples were run on a total of 3 Bioplex plates. A set of four samples were repeatedly run on all three plates and concentration values for each antigen were compared between plates using simple linear regression (A-C) (N=16 antibody values). WHO reference samples (COVID-19 convalescent plasma panel NIBSC 20/118) were obtained from the National Institute for Biological Standards and Control, United Kingdom. IgG concentration (U/ml) from Bioplex were compared with values derived by ELISA (D, E). Graphs are nonlinear, sigmoidal 4PL least squares fit.

## Supplemental Figure 2

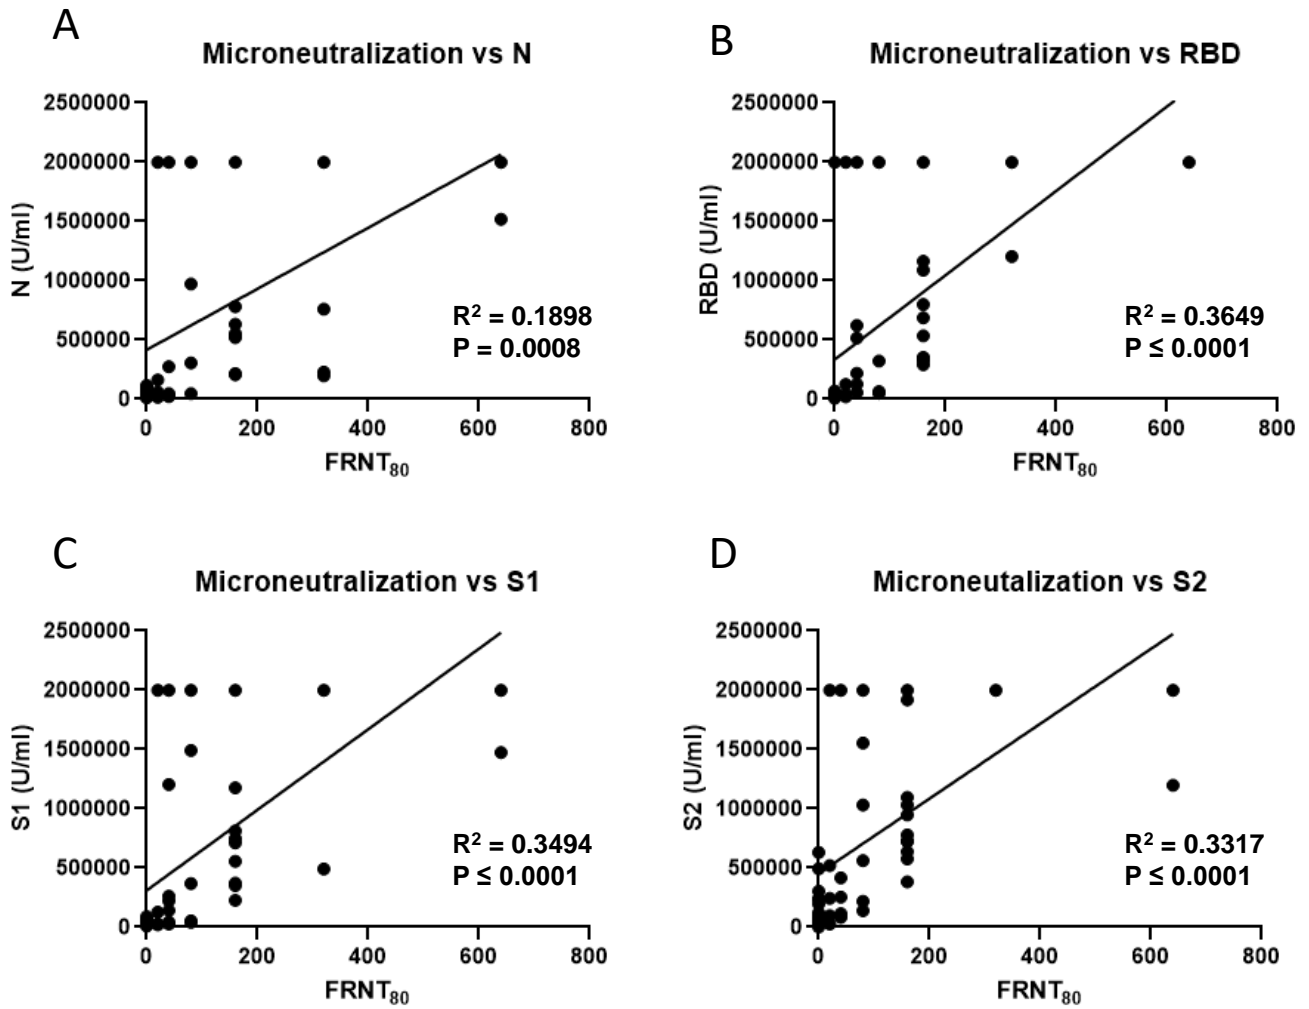

**Supplemental Figure 2** – Comparison of microneutralization titers and IgG concentrations for each antigen tested. Bioplex derived antibody concentration (U/ml) were compared with microneutralization titer (1:X) by simple linear regression (A-D) (N=56).

# Supplemental Figure 3

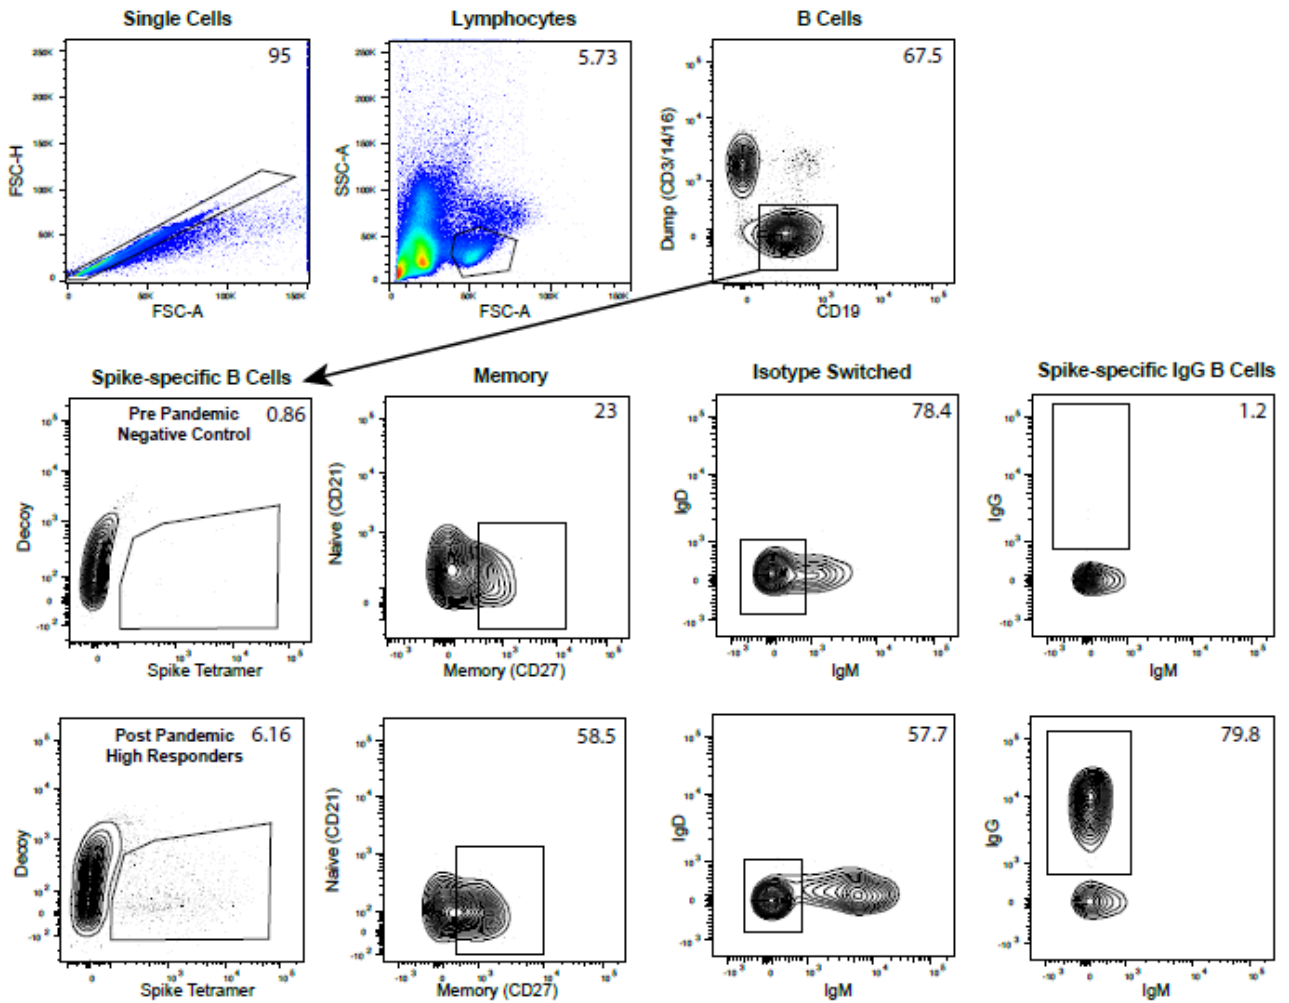

**Supplemental Figure 3** – Memory B cell flow cytometry gating strategy. Lymphocytes were gated by CD19 positivity, CD21/CD27 status, and IgD, IgM, and IgG positivity to identify spike specific memory B cells, isotype switched B cells, and IgG producing B cells. Spike specificity was determined using a spike tetramer (N=4 pre- pandemic controls, N=21 high responders).

# Supplemental Figure 4

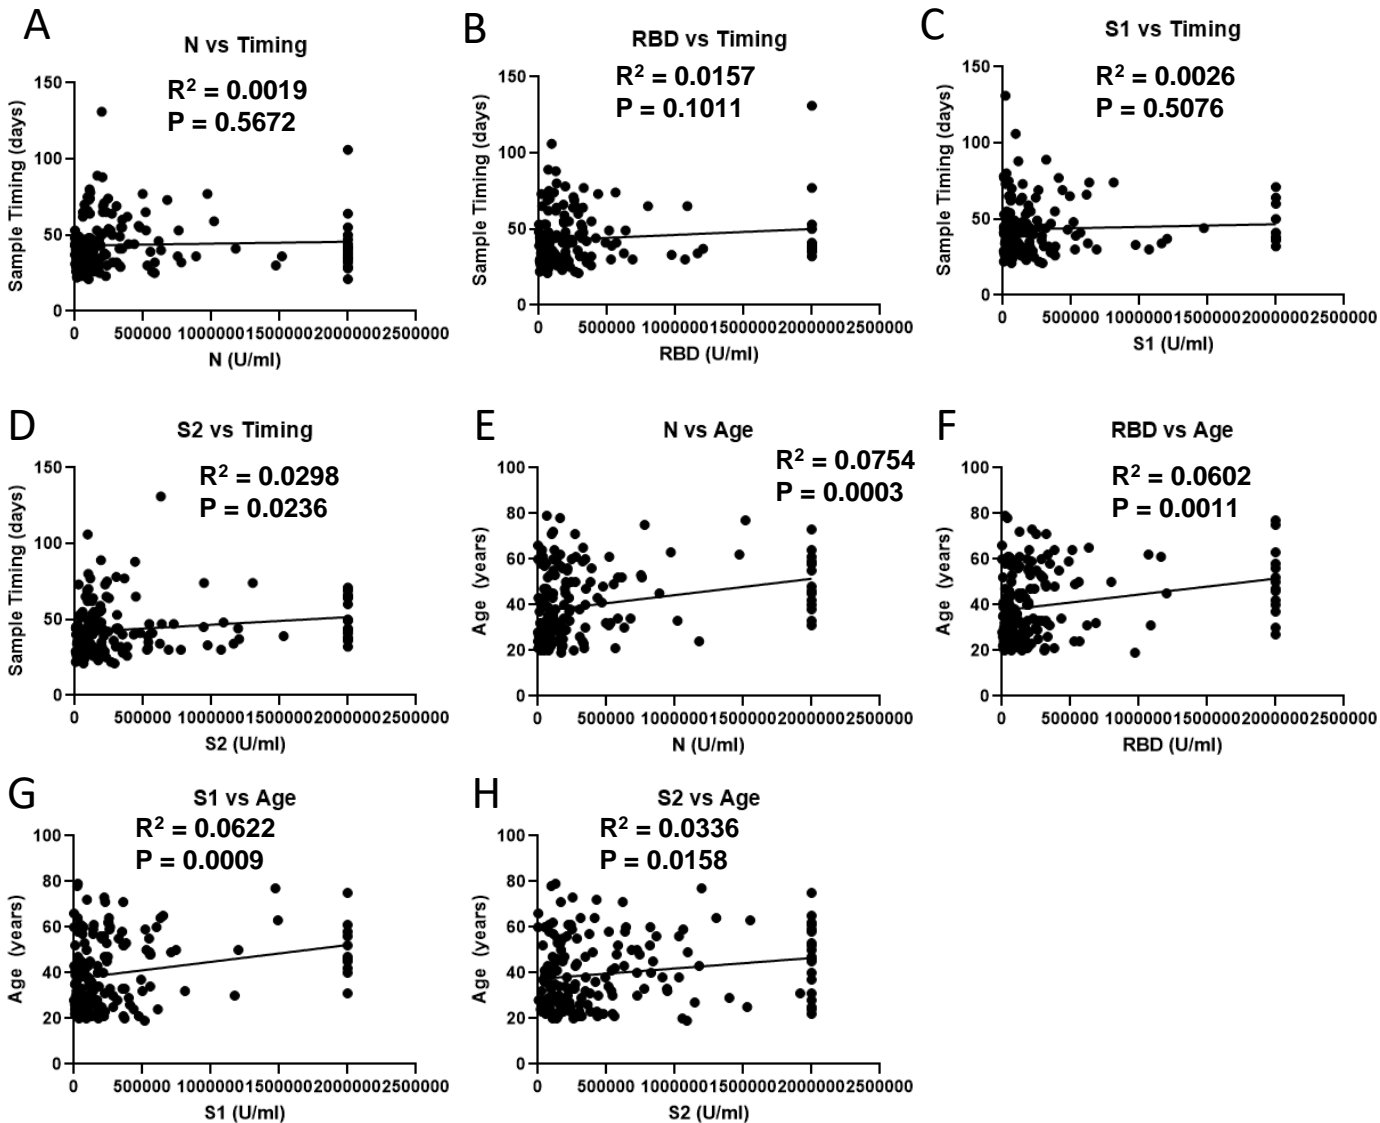

**Supplemental Figure 4** – The correlation between sample timing or participant age and SARS-Cov-2 antibody concentration. Antibody concentrations were determined by Bioplex assay and compared with the number of days post-symptoms for each patient using simple linear regression (A-D) (N=172). Antibody concentrations were determined by Bioplex assay and compared with patient age using simple linear regression (E-H) (N=173).
